# Supplementary material for: Role of combined use of mean platelet volume-to-lymphocyte ratio and monocyte to high-density lipoprotein cholesterol ratio in predicting patients with acute myocardial infarction
Source: PubMed Central journal article supplement (PMC10163726; doi:10.1186/s13019-023-02268-4), 2023-05-06

Figure s1. Correlation between MPVLR, HHR and Gensini score, Grace Score.

(A)

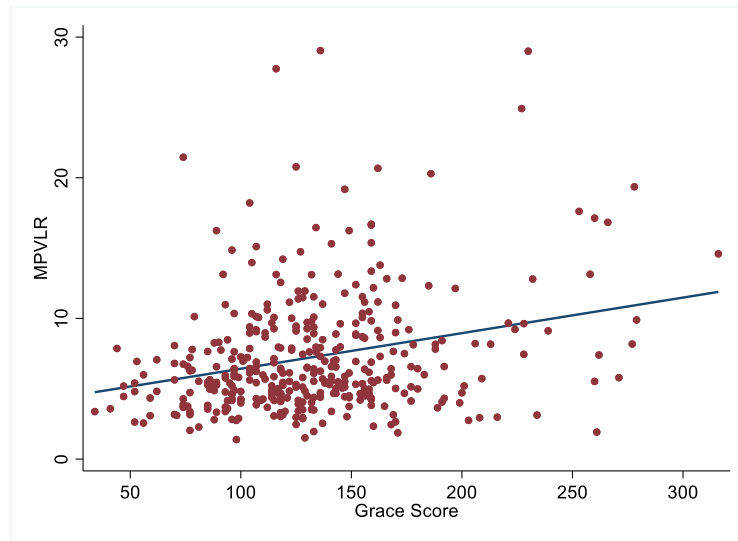

(B)

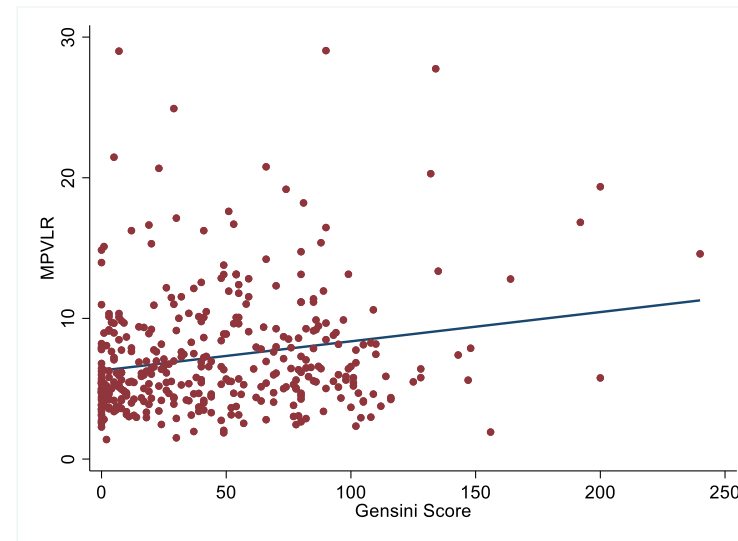

(C)

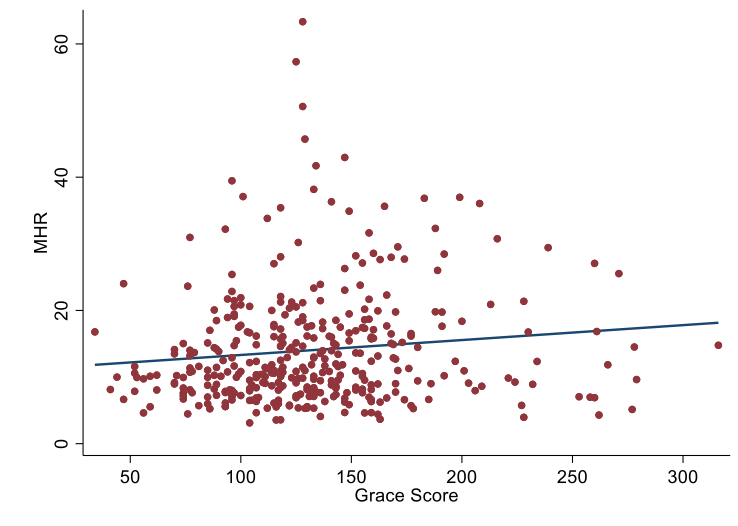

(D)

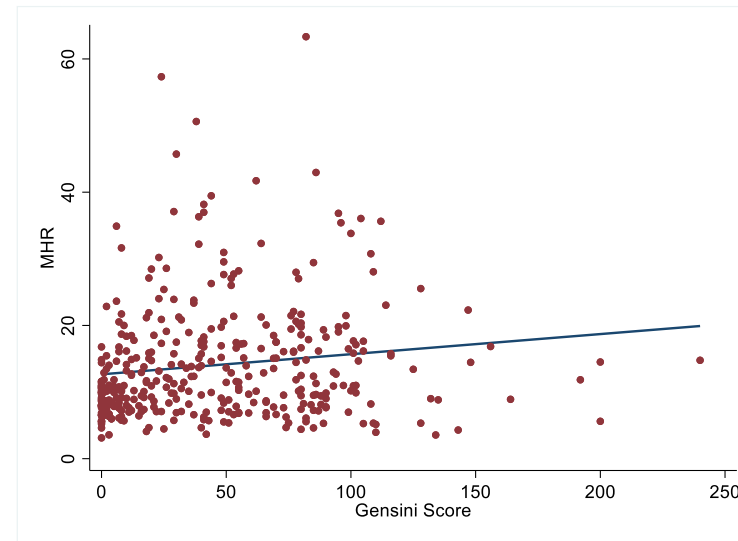

Supplement: 13019_2023_2268_MOESM1_ESM.pdf [file 13019_2023_2268_MOESM1_ESM.pdf]
